# Supplementary material for: Integrated transcriptomic and proteomic analysis identifies protein kinase CK2 as a key signaling node in an inflammatory cytokine network in ovarian cancer cells
Source: PubMed Central journal article supplement (PMC4941267; doi:10.18632/oncotarget.7255), 2016-02-08
Supplement: oncotarget-07-15648-s001.pdf [file oncotarget-07-15648-s001.pdf]

## **SUPPLEMENTARY TABLES**

**Supplementary Table S1A: List of compounds whose transcriptional response is similar to that induced by the knock-down of the TNF Network**

See Supplementary File 1

**Supplementary Table S1B: Annotations and documented effects for the list of compounds whose transcriptional response is similar to that induced by the knock-down of the TNF Network**

See Supplementary File 1

**Supplementary Table S1C: Enriched drug features for drug community n. 32 in the MANTRA neighbourhood of shCRXCR4**

See Supplementary File 1

**Supplementary Table S1D: Enriched drug features for drug community n. 13 in the MANTRA neighbourhood of shCRXCR4**

See Supplementary File 1

**Supplementary Table S1E: Enriched drug features for drug community n. 42 in the MANTRA neighbourhood of shCRXCR4**

See Supplementary File 1

**Supplementary Table S1F: Enriched drug features for drug community n. 89 in the MANTRA neighbourhood of shCRXCR4**

See Supplementary File 1
